# Supplementary material for: Multiple site occupancy induced a novel broadband Ca8(Al12O24)(WO4)2: Eu2+ blue phosphor for pc-converted WLEDs
Source: Research Square preprint supplement (doi:10.21203/rs.3.rs-7685444/v1), 2025-10-09
Supplement: Supplementary file 1 [file 967570476adcb34abd1c72d2.docx]

**Multiple site occupancy induced novel broadband Ca8(Al12O24)(WO4)2: Eu2+ blue phosphors towards full-spectrum WLEDs**

Ningning Feng,1,2,3,4,5 Jiangshan Han,3 Hua Jiao,1,2 Lin Yuan,3,4,5 Rui Huang,3 Guoqing Zhang,3,4,5 Boyu Wang,3,4,5,* Kang Zhao1,2,*

*1Department of Materials Science and Engineering, Xi’an University of Technology, Xi’an, Shaanxi, 710048, PR China*

*2Department of Materials Science and Engineering, Shaanxi Province Key Laboratory of Corrosion and Protection, Xi’an University of Technology, Xi’an 710048, PR China*

*3School of Science, Xi’an Polytechnic University, Xi’an, Shaanxi, 710048, PR China*

*4Flexible Radiation Protection Technology of Engineering Research Center, Xi’an Polytechnic University, Xi’an, Shaanxi, 710048, PR China*

*5Xi’an Key Laboratory of Nuclear Protection Textile Equipment Technology, Xi’an Polytechnic University, Xi’an, Shaanxi, 710048, PR China*

**Email:* [*kzhao@xaut.edu.cn*](mailto:kzhao@xaut.edu.cn);[*wangby2008@foxmail.com*](mailto:wangby2008@foxmail.com)

**S1 Supplementary Figure**


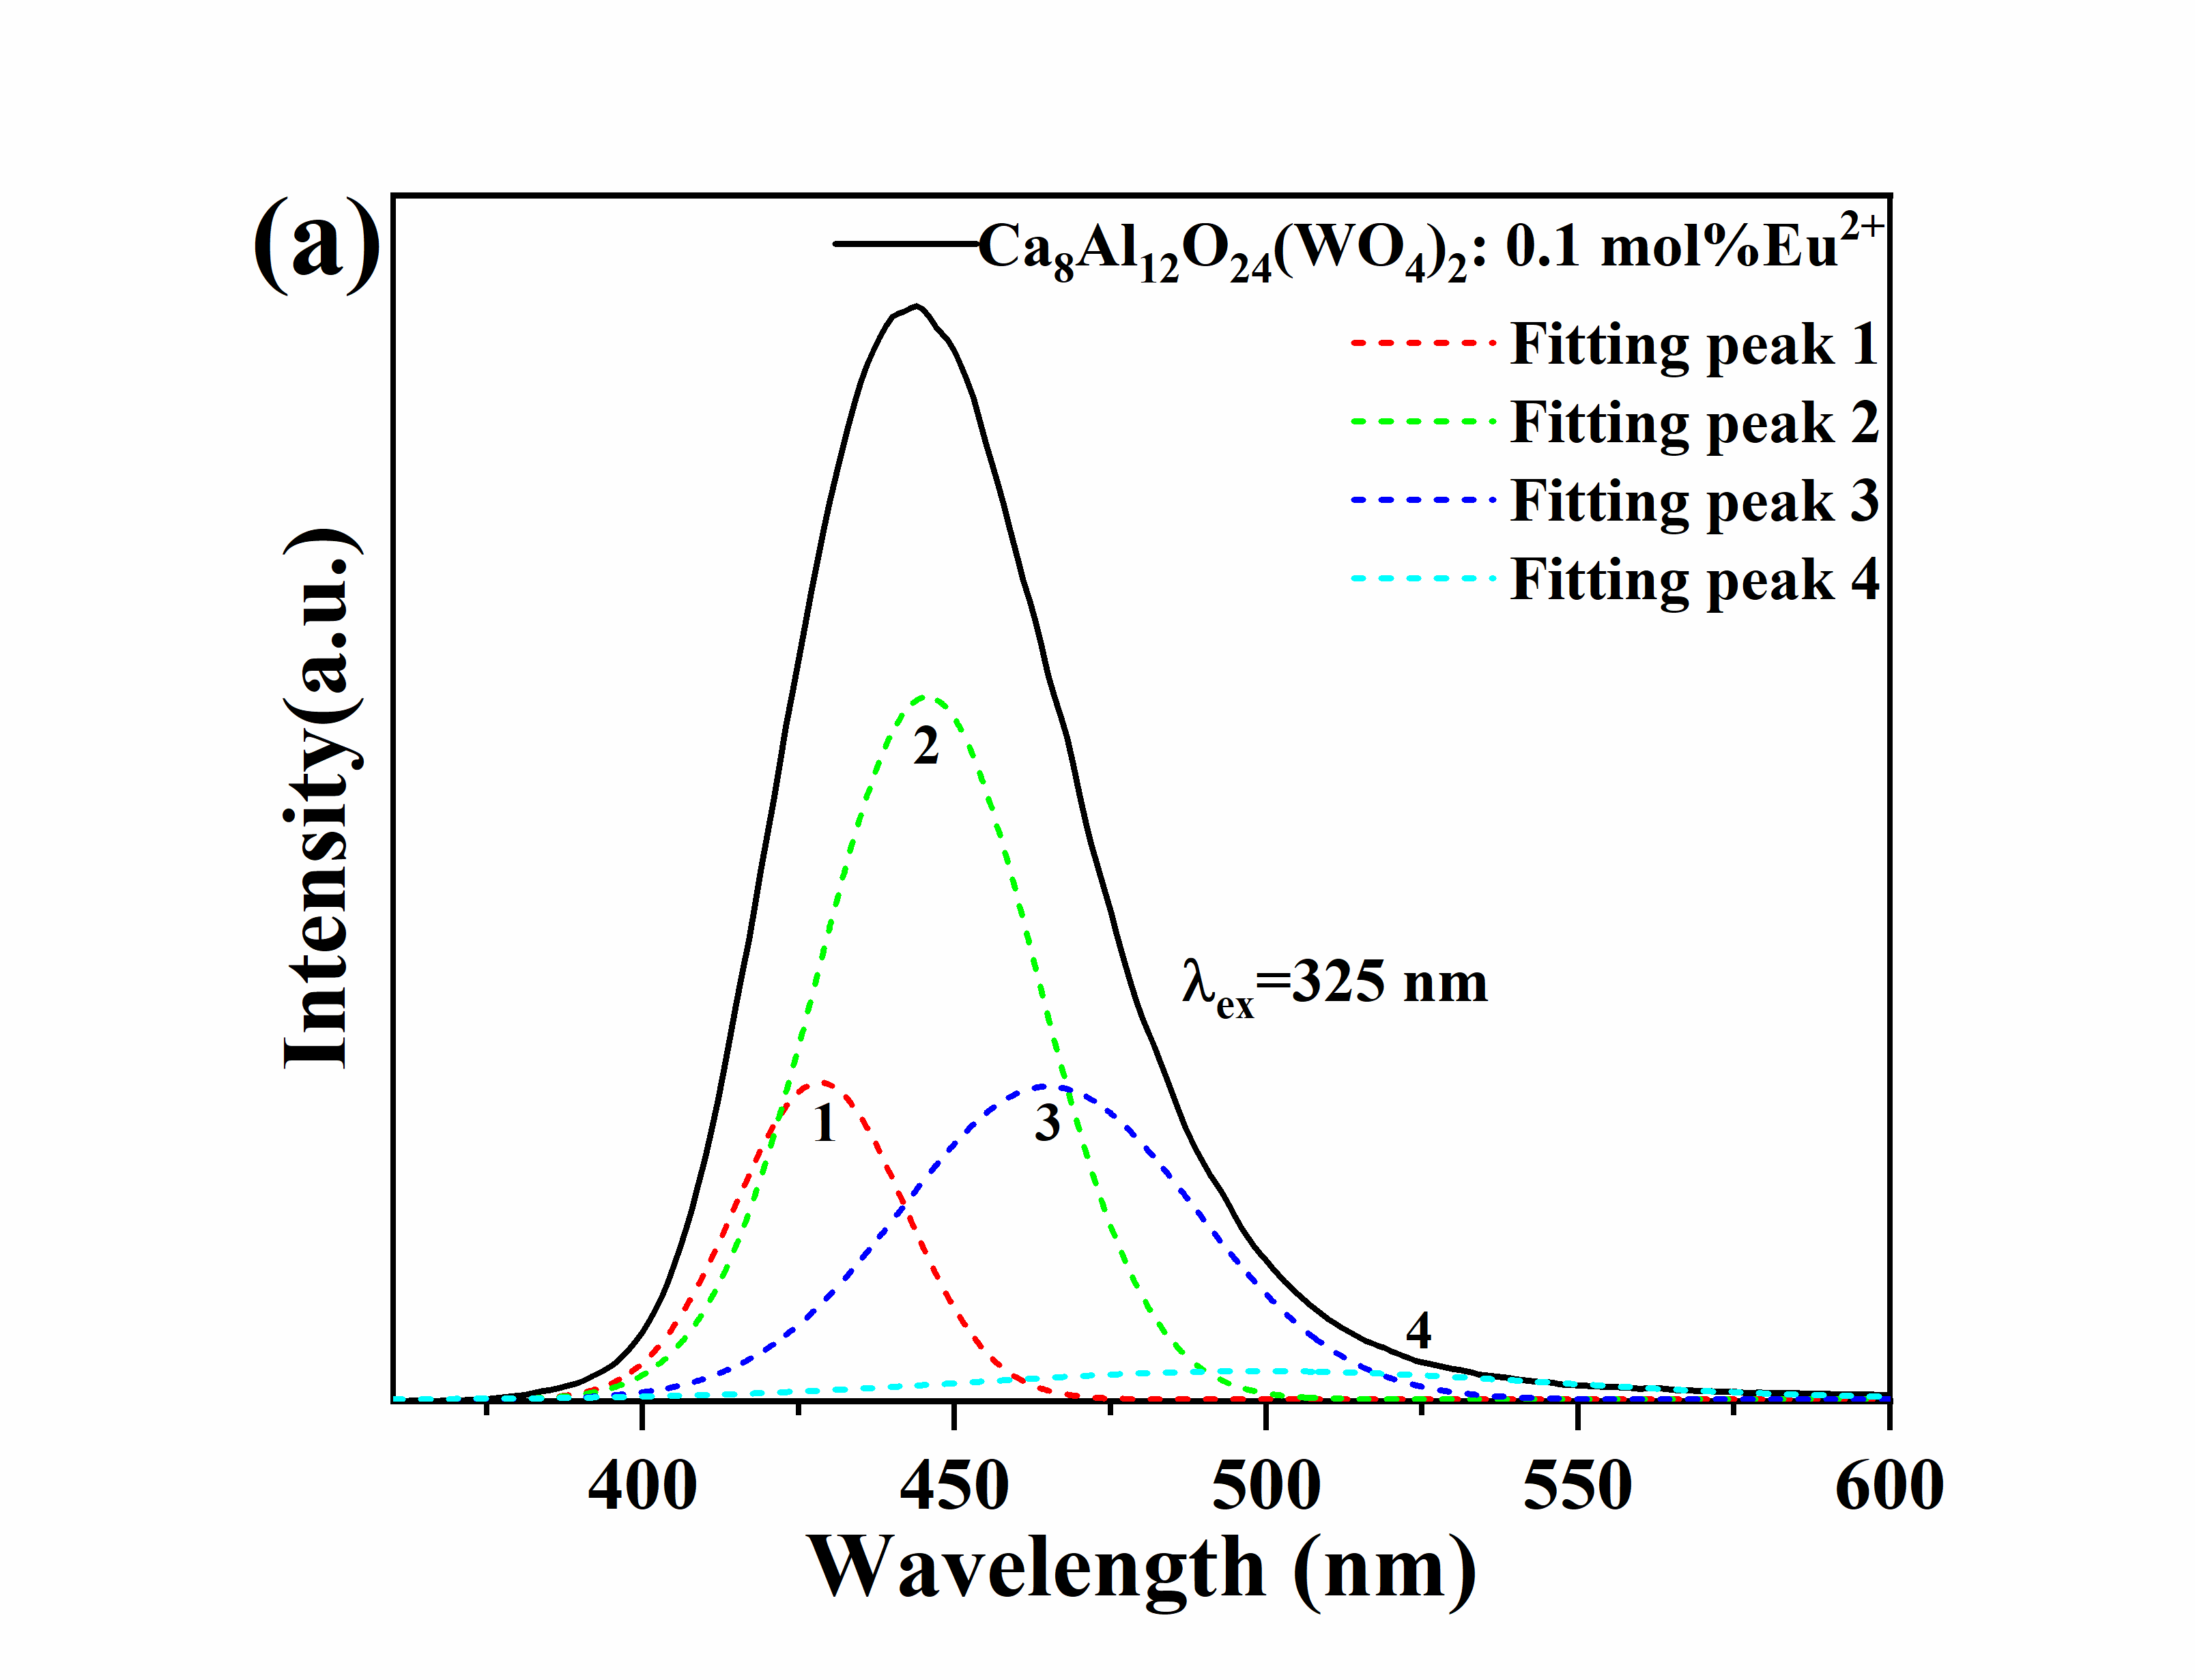

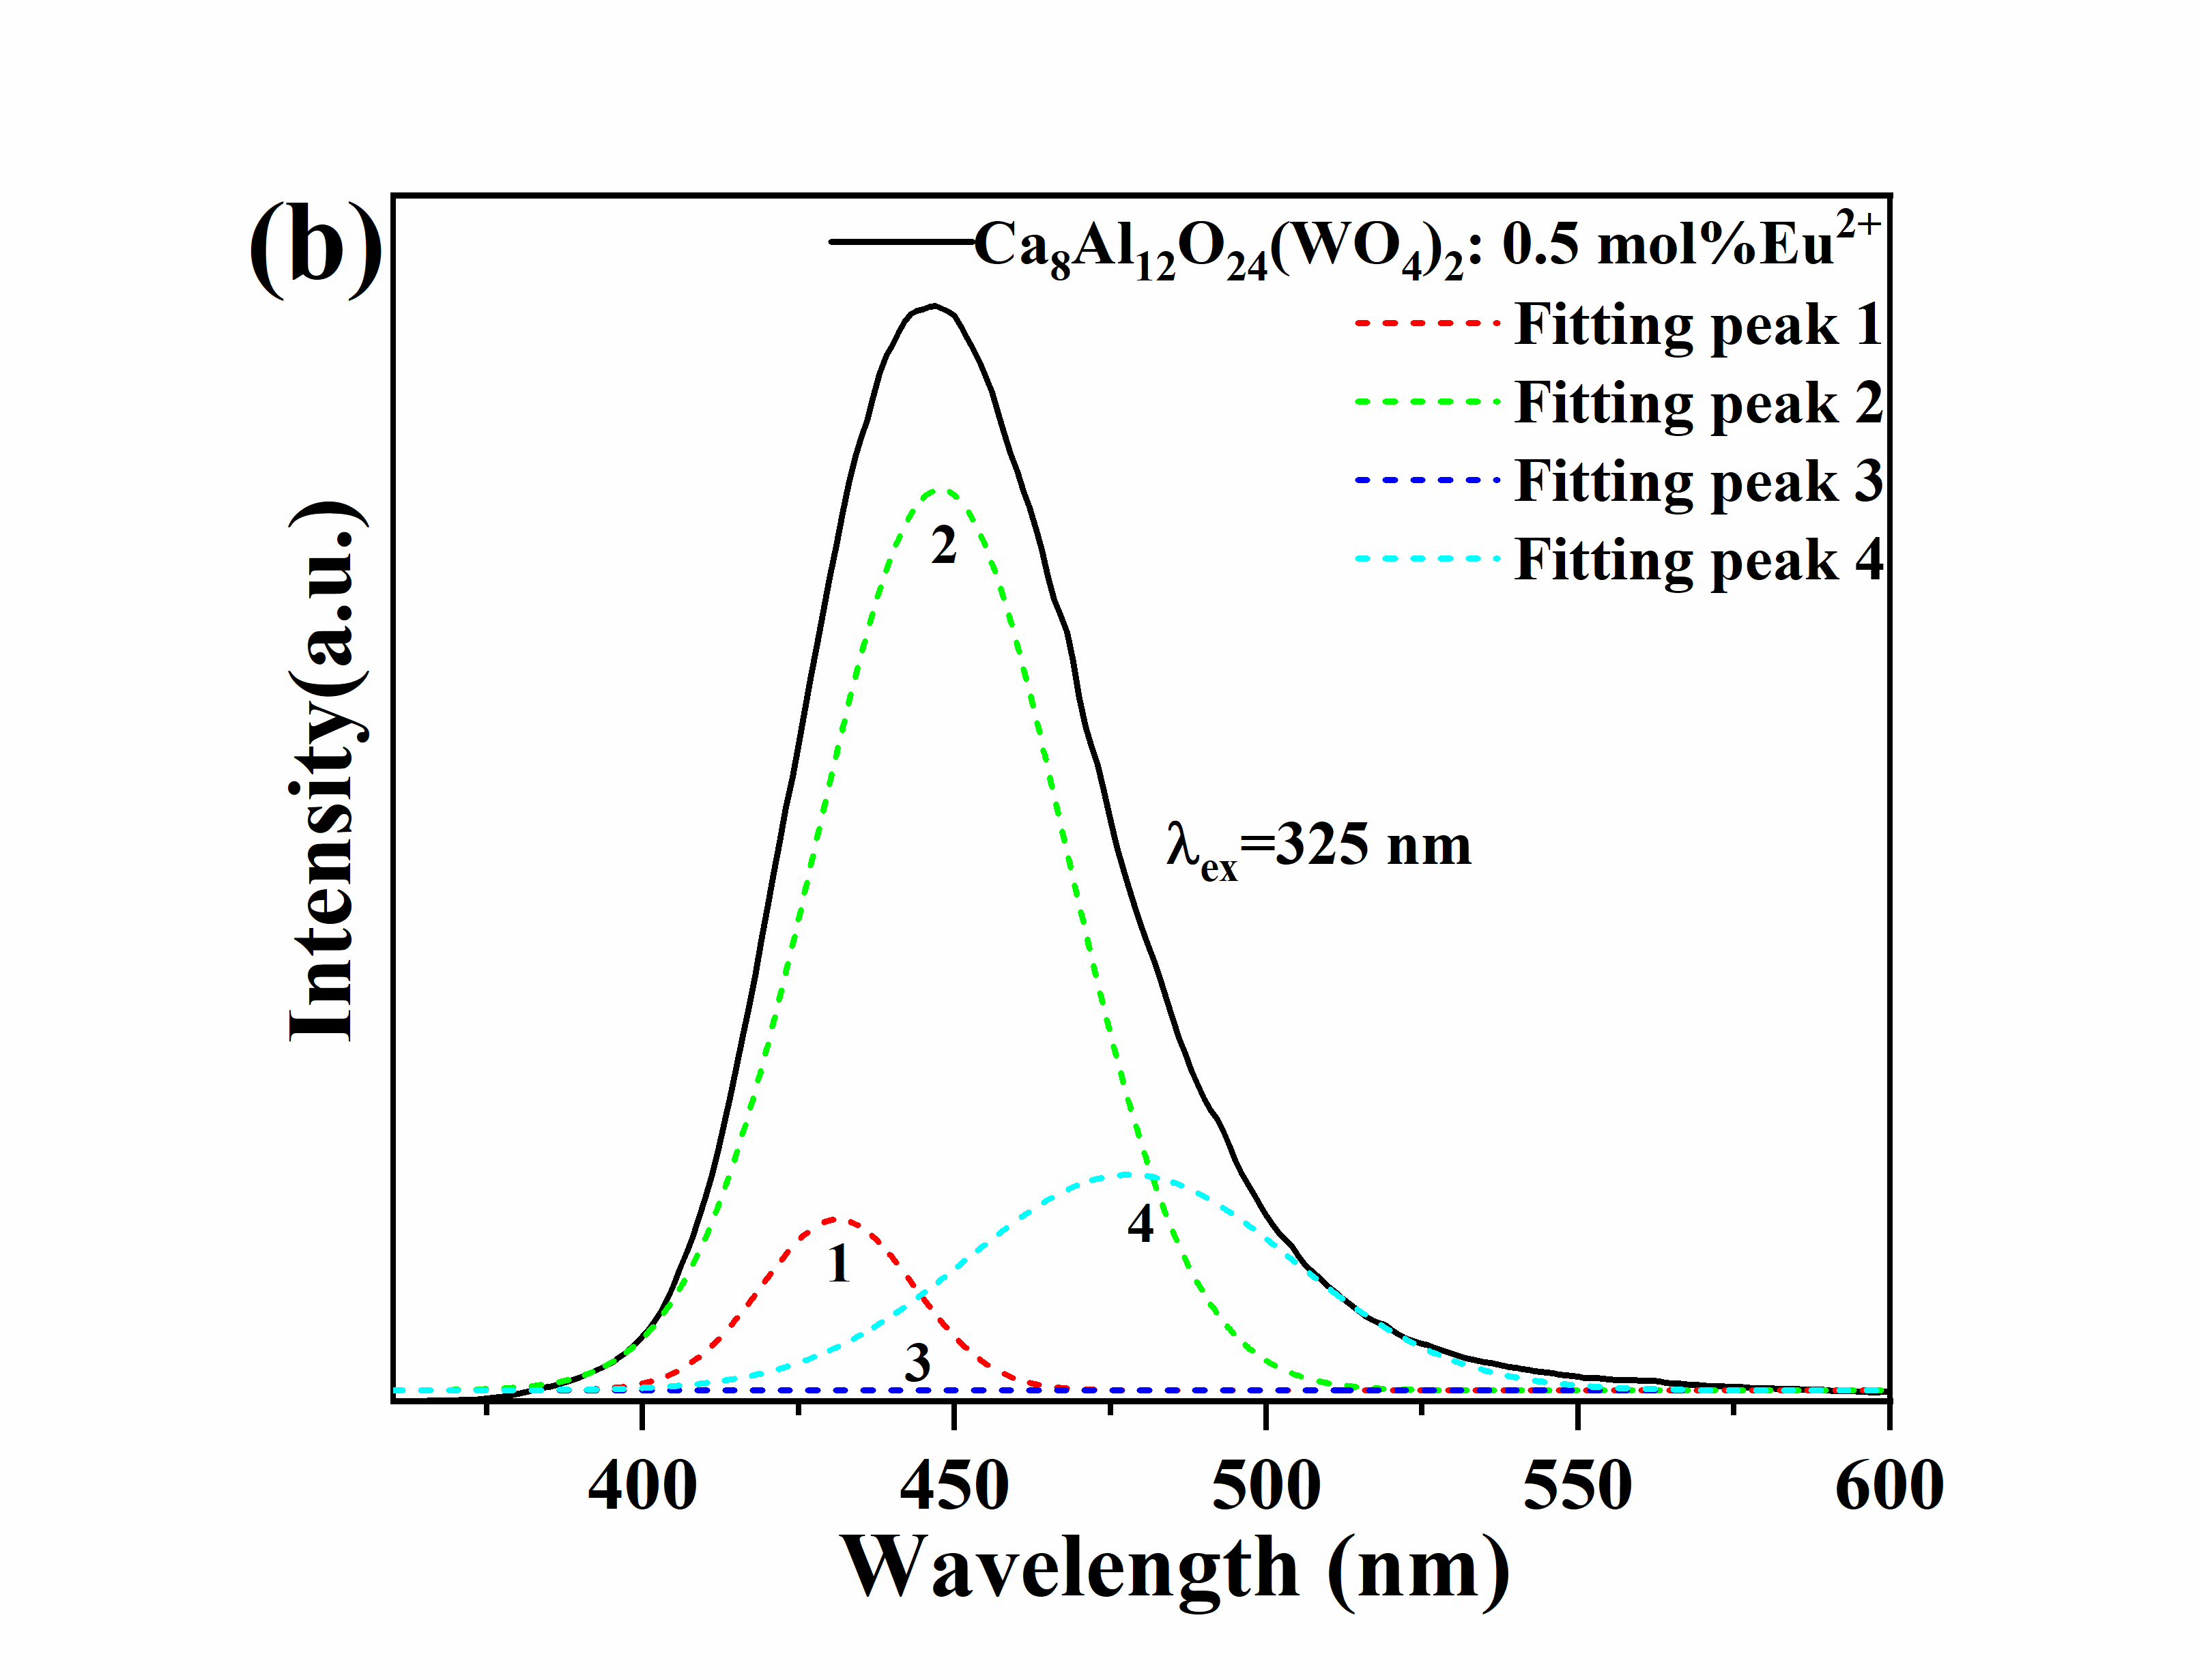

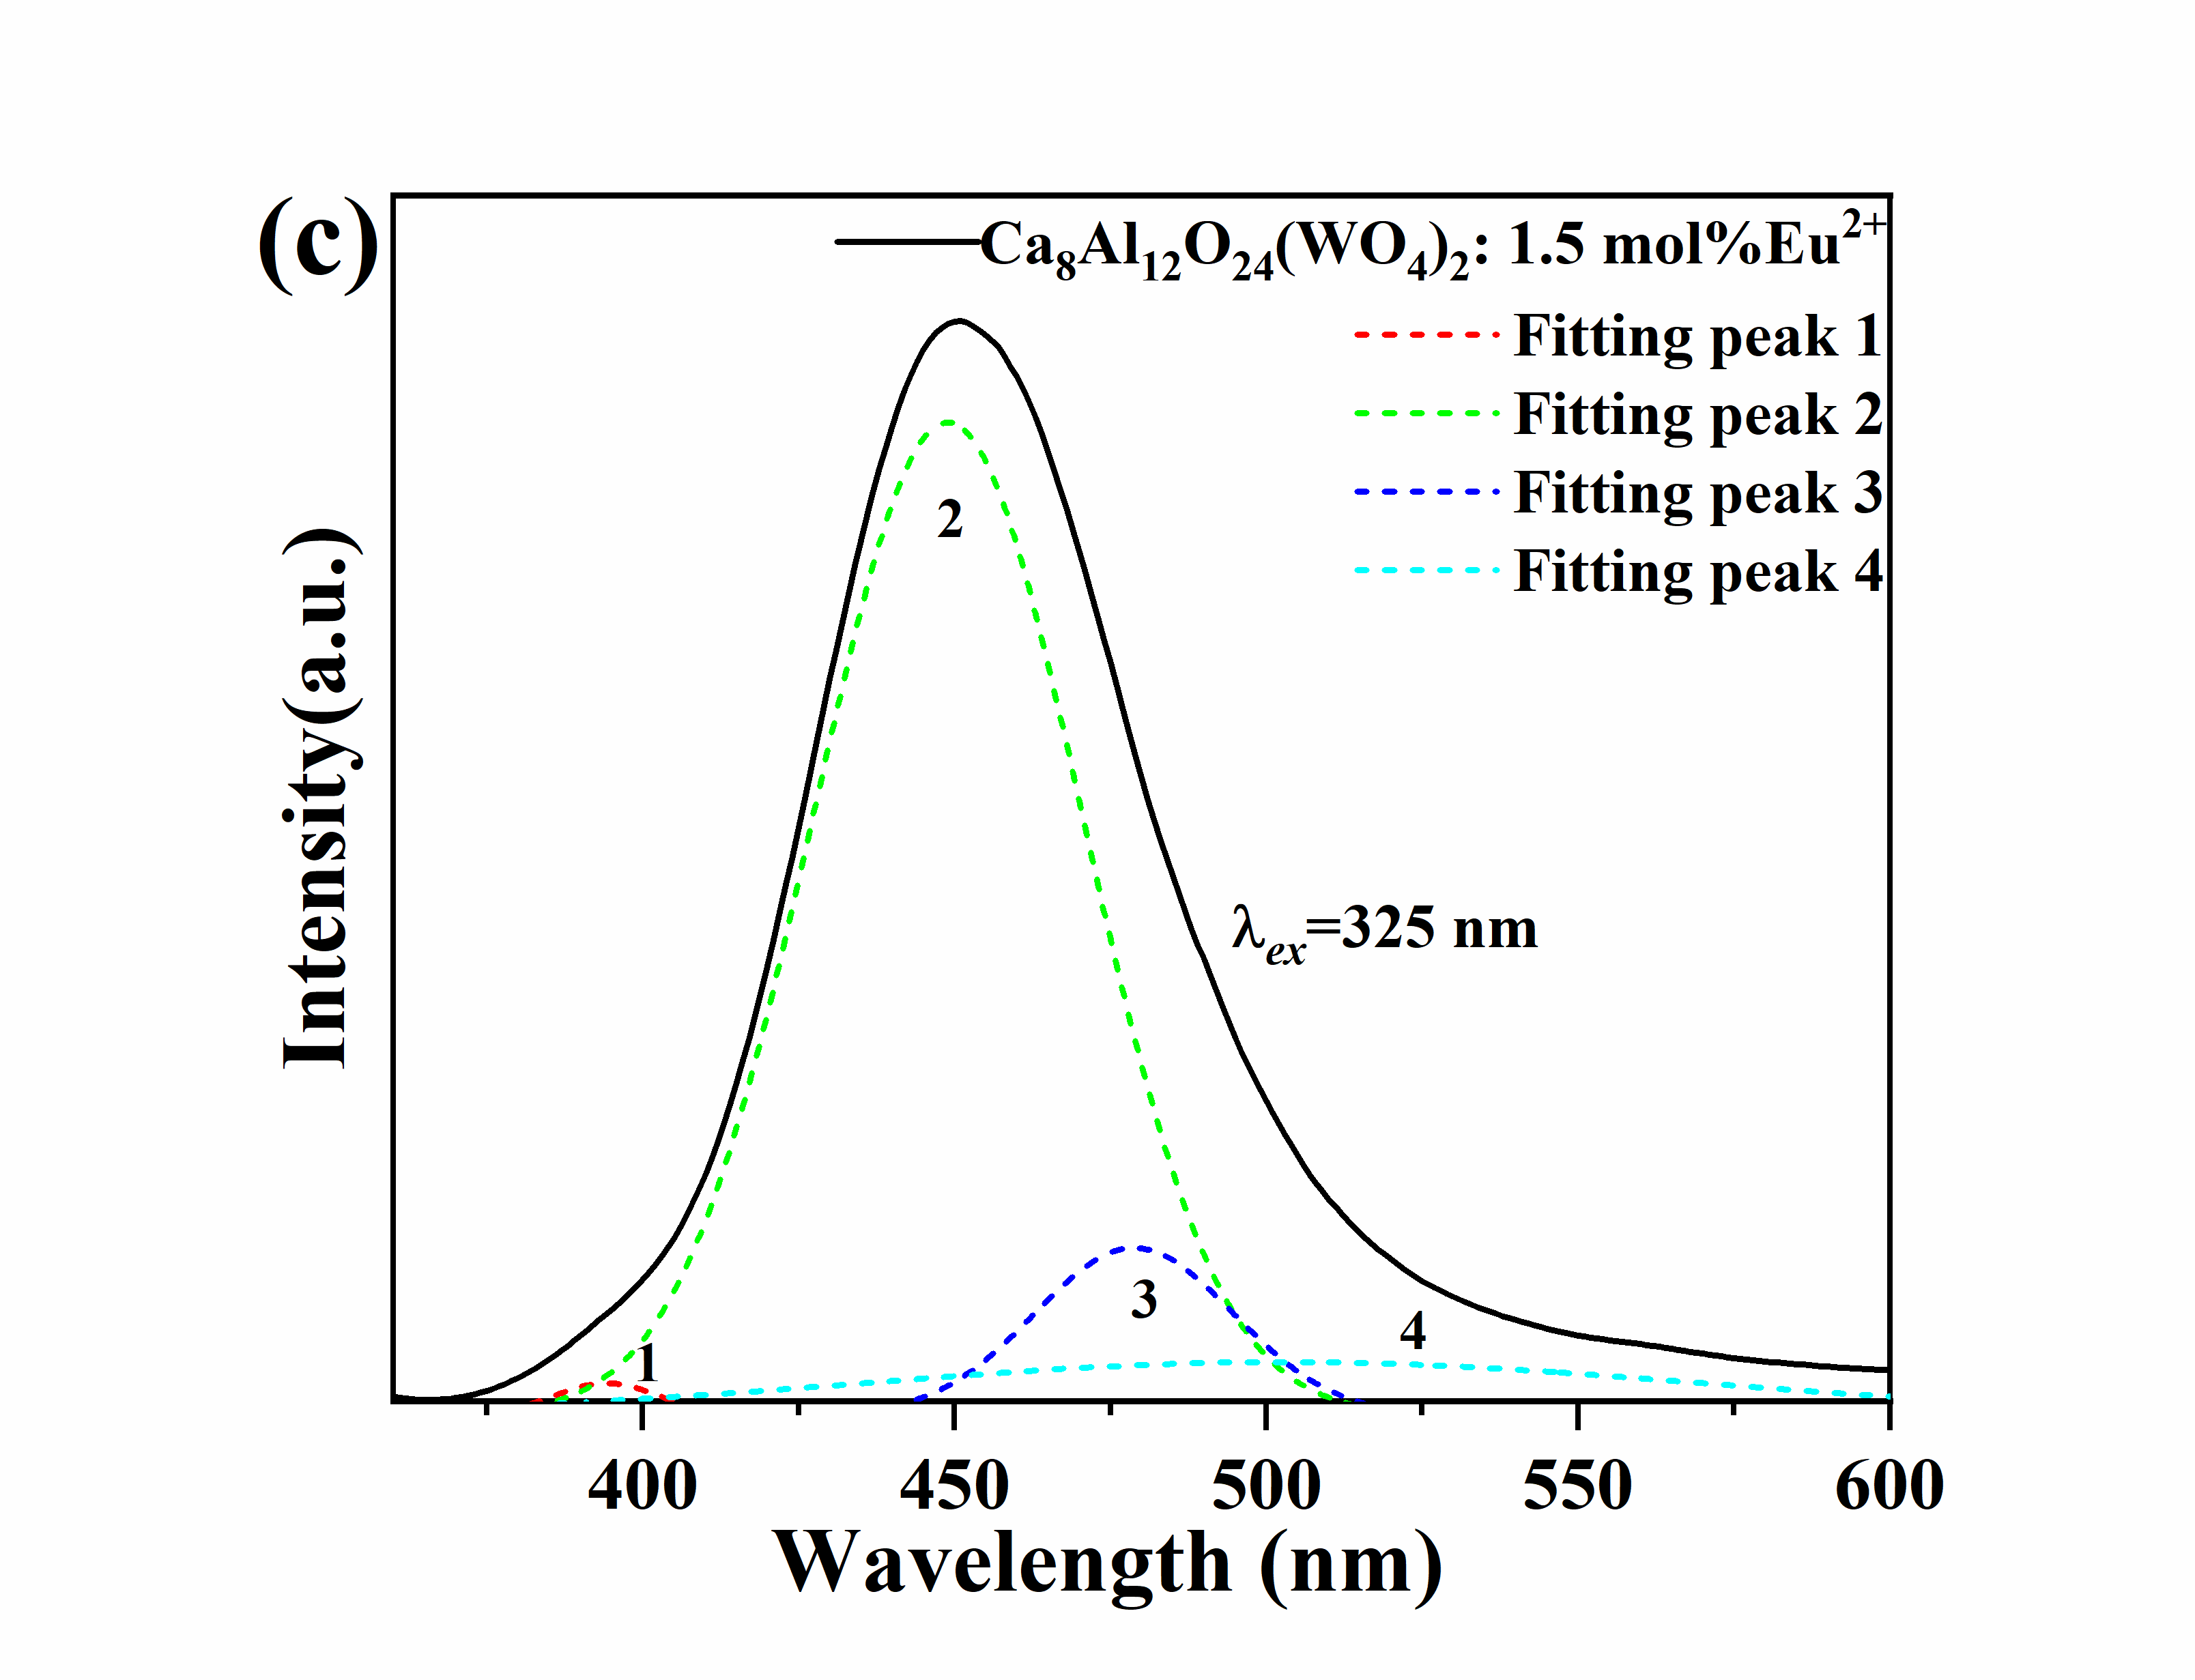

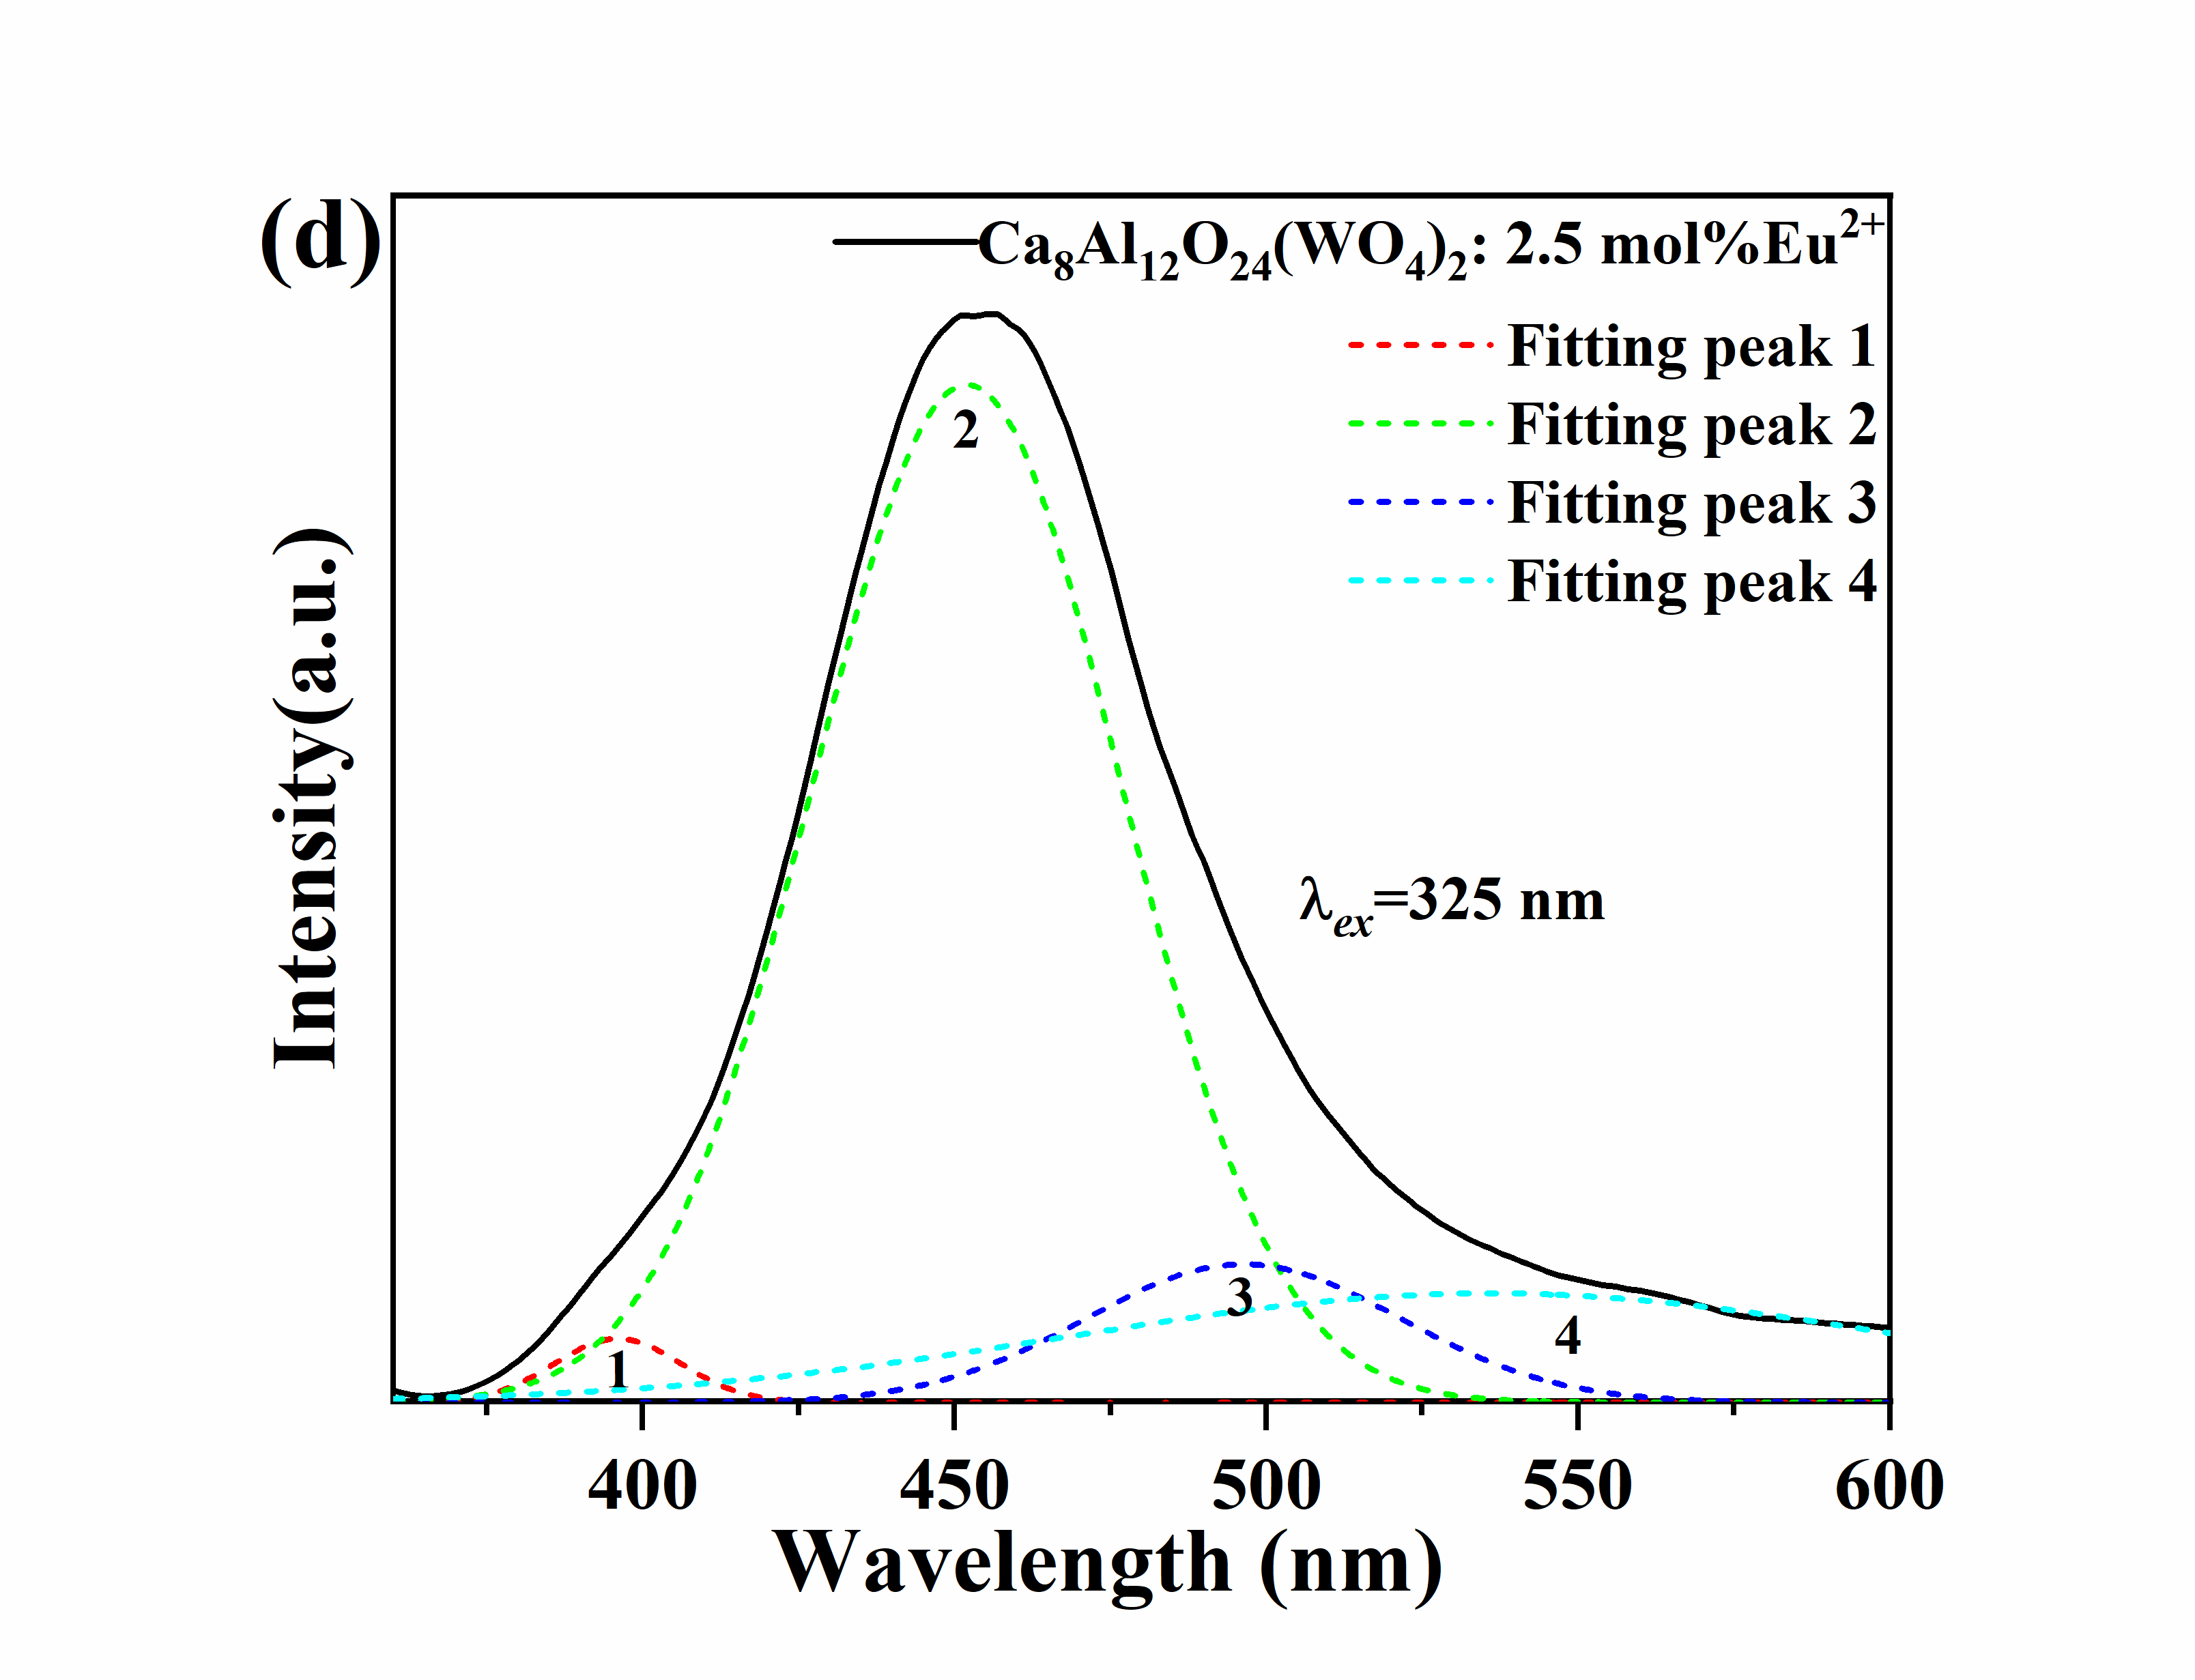


**Figure S1.** Gaussian fitting for the PL spectrum of CAWO: *x* mol%Eu2+ (*x*=0.1, 0.5, 1.5, and 2.5) phosphors
